# Supplementary material for: Degradation of α-melanocyte-stimulating hormone photosensitized by pterin
Source: Royal Society of Chemistry journal article supplement (doi:10.1039/c4ob00434e), 2014-01-01
Supplement: c4ob00434e1.pdf [file c4ob00434e1.pdf]

### Electronic Supplementary Information

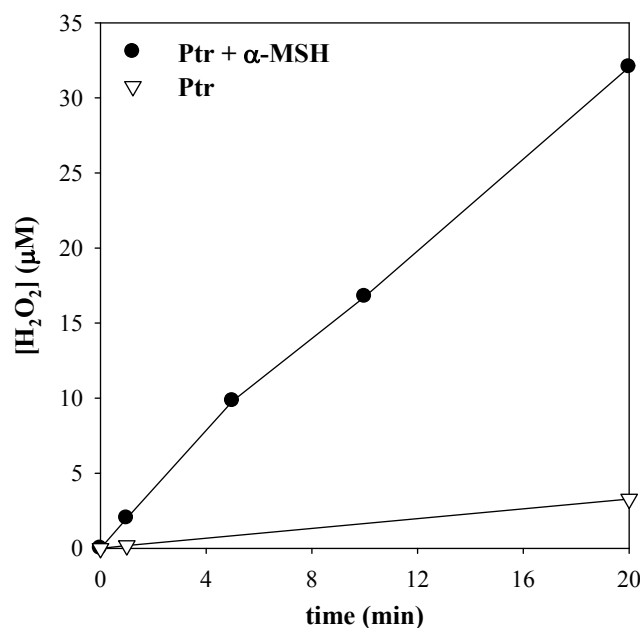

**Figure S1.**

Evolution of the  $\text{H}_2\text{O}_2$  concentration in air-equilibrated aqueous solutions ( $\text{pH} = 5.5$ ) of Ptr (100  $\mu\text{M}$ ) in the absence and in the presence of  $\alpha$ -MSH (20  $\mu\text{M}$ ). The solutions were exposed to UV-A radiation using the light source I.
